# Supplementary material for: Intense pH Sensitivity Modulation in Carbon Nanotube-Based Field-Effect Transistor by Non-Covalent Polyfluorene Functionalization
Source: MDPI journal article supplement (doi:10.3390/nano13071157), 2023-03-24
Supplement: s1 [file s1]

# Intense pH sensitivity Modulation in Carbon Nanotube-Based Field-Effect Transistor By Non-Covalent Polyfluorene Functionalization

Gookbin Cho <sup>1</sup>, Eva Grinval <sup>1</sup>, Jean-Christophe P. Gabriel <sup>2</sup> and Bérangère Lebental <sup>3,\*</sup>

<sup>1</sup> Laboratoire de Physique des Interfaces et des Couches Minces, LPICM, CNRS, Ecole polytechnique, Institut Polytechnique Paris, 91128 Palaiseau, France

<sup>2</sup> Université Paris-Saclay, NIMBE (UMR CEA/CNRS 3685), LICSEN, 91191 Gif sur Yvette, France

<sup>3</sup> Université Gustave Eiffel, COSYS, IMSE, Marne-la-Vallée Campus, 77447 Marne-La-Vallée, France

\* Correspondence: berengere.lebental@univ-eiffel.fr

## 1. Wirebonded chips on PCB

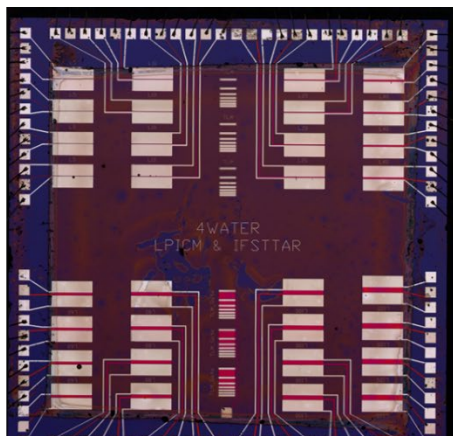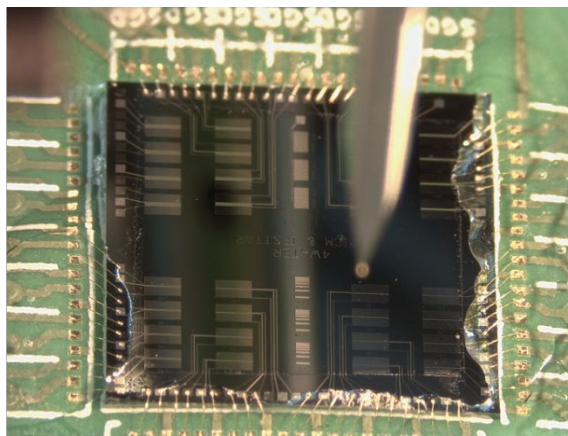

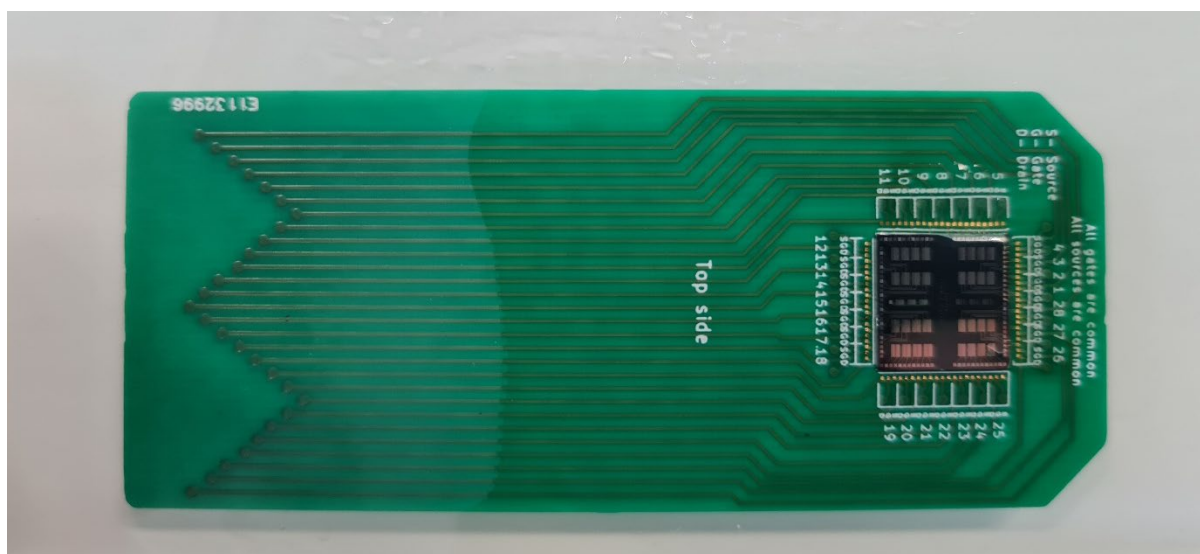

**Figure S1.** (upper-left) Ink-jet printed CNT-FET device after PMMA deposition process (upper-right) Wire bonded chip, with passivation of the wirebonding by UV resist. (below) Image of a PCB and CNT-FET devices after wire bonding and passivation process.

## 2. Formulation of the phosphate buffer

**Table S1.** Detailed amount of Sodium phosphate dibasic heptahydrate and Sodium phosphate monobasic monohydrate for 0.1 M phosphate buffer solution.

| pH | <b>Na<sub>2</sub>HPO<sub>4</sub>·7H<sub>2</sub>O</b><br>(Sodium phosphate dibasic heptahydrate) (g) | <b>NaH<sub>2</sub>PO<sub>4</sub>·H<sub>2</sub>O</b><br>(Sodium phosphate monobasic monohydrate) (g) | Additional acid or base |
|----|-----------------------------------------------------------------------------------------------------|-----------------------------------------------------------------------------------------------------|-------------------------|
| 3  | 3.669                                                                                               | 11.911                                                                                              | HCl until pH 3          |
| 4  | 3.669                                                                                               | 11.911                                                                                              | HCl until pH 4          |
| 5  | 3.669                                                                                               | 11.911                                                                                              | HCl until pH 5          |
| 6  | 3.669                                                                                               | 11.911                                                                                              |                         |
| 7  | 15.483                                                                                              | 5.827                                                                                               |                         |
| 8  | 15.483                                                                                              | 5.827                                                                                               | NaOH until pH 8         |
| 9  | 15.483                                                                                              | 5.827                                                                                               | NaOH until pH 9         |

### 3. Transfer curves in air

The electrical transfer curves of p-CNTFETs and f-CNTFETs in air before and after passivation were measured (Figure 2). They show hysteresis and charging effect for both types of CNTFETs, with both effects being particularly pronounced for the f-CNTFETs. As expected, passivation reduced the hysteresis and the charging effect.

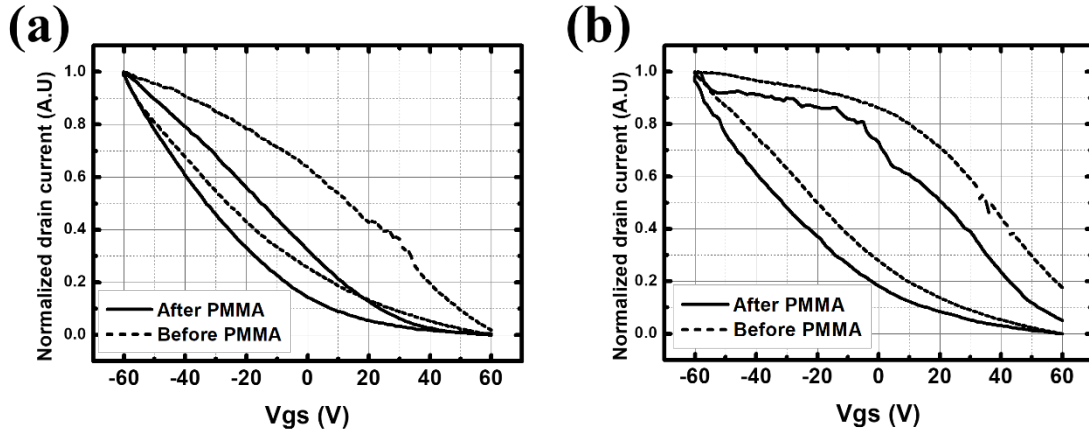

**Figure S2.** Normalized I-V transfer curve (e.g.  $I/I_{on}$  as a function of  $V_{gs}$ ) of (a) p-CNTFET and (b) f-CNTFET before PMMA deposition (dotted line) and after PMMA deposition (solid line) in air. Channel length of each device is 5  $\mu\text{m}$ .

Figure S3 shows the  $I_{on}/I_{off}$  ratio for the p-CNTFET as a function of channel length. It tends to increase up to 60  $\mu\text{m}$  channel length and then stabilizes, with a possible outlier at 10  $\mu\text{m}$ .

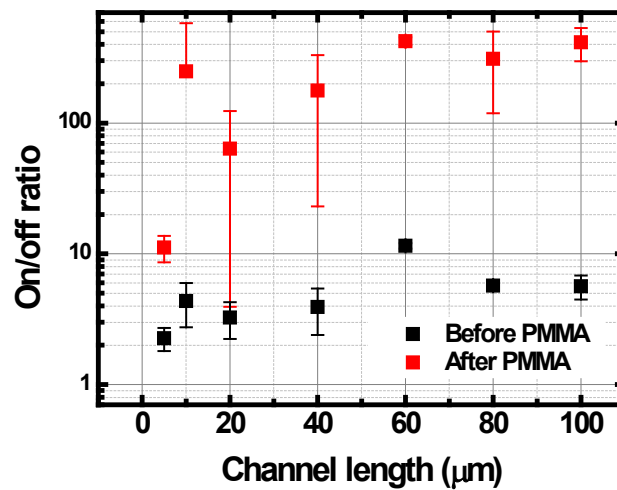

**Figure S3.**  $I_{on}/I_{off}$  ratio of p-CNTFETs before and after PMMA deposition with respect to channel length from 5  $\mu\text{m}$  up to 100  $\mu\text{m}$ .

Figure S4 and Figure S5 show  $I_{on}$  and  $I_{off}$  for p-CNTFET and f-CNTFET, respectively, as a function of channel length. The stronger effect of passivation on  $I_{off}$  than on  $I_{on}$  is clear. For p-CNTFET, the threshold channel length at 60  $\mu\text{m}$  is more obvious than for  $I_{on}/I_{off}$ .

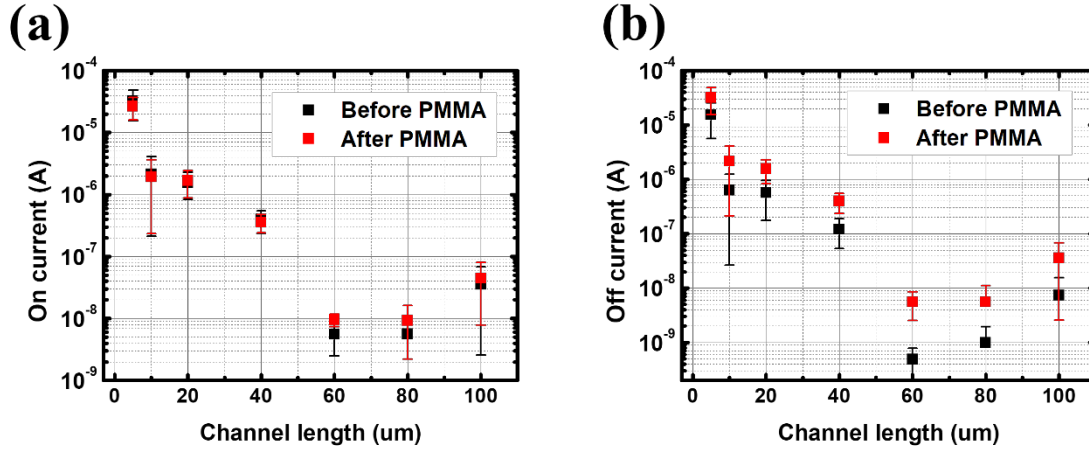

**Figure S4.** (a)  $I_{on}$  and (b)  $I_{off}$  of p-CNTFETs before and after PMMA passivation with respect to channel length from 5  $\mu\text{m}$  to 100  $\mu\text{m}$ .

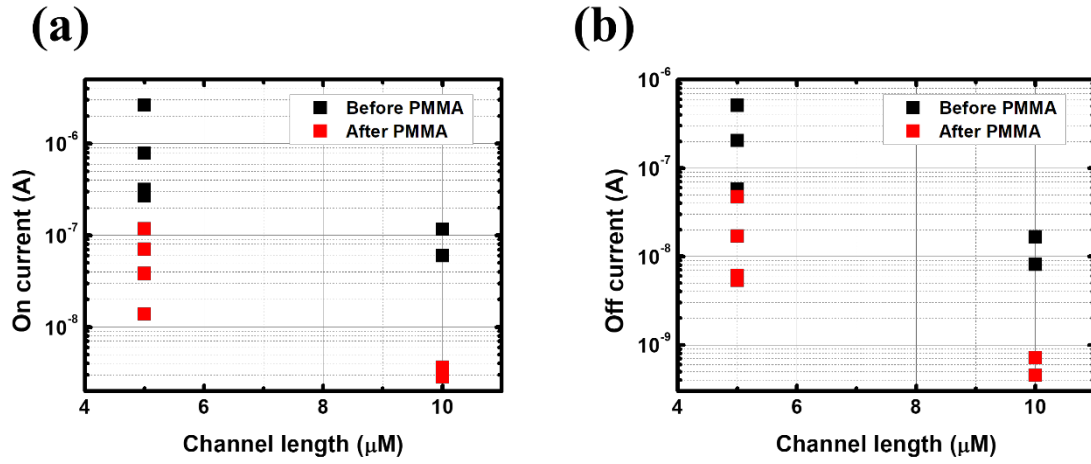

**Figure S5.** (a)  $I_{on}$  and (b)  $I_{off}$  of f-CNTFETs before and after PMMA passivation with respect to channel length from 5  $\mu\text{m}$  to 10  $\mu\text{m}$ .

#### 4. CNTFET characterizations in water

Figure S6 shows the comparison of current levels in water at different gate voltages for a device without CNTs and a device with CNTs. The CNTFET clearly shows a transistor behavior in water between -1 V and +1 V. The comparison with the CNT-less chip shows that the transistor effect in water cannot be attributed to the conductivity of the water alone or to disturbances in the chip.

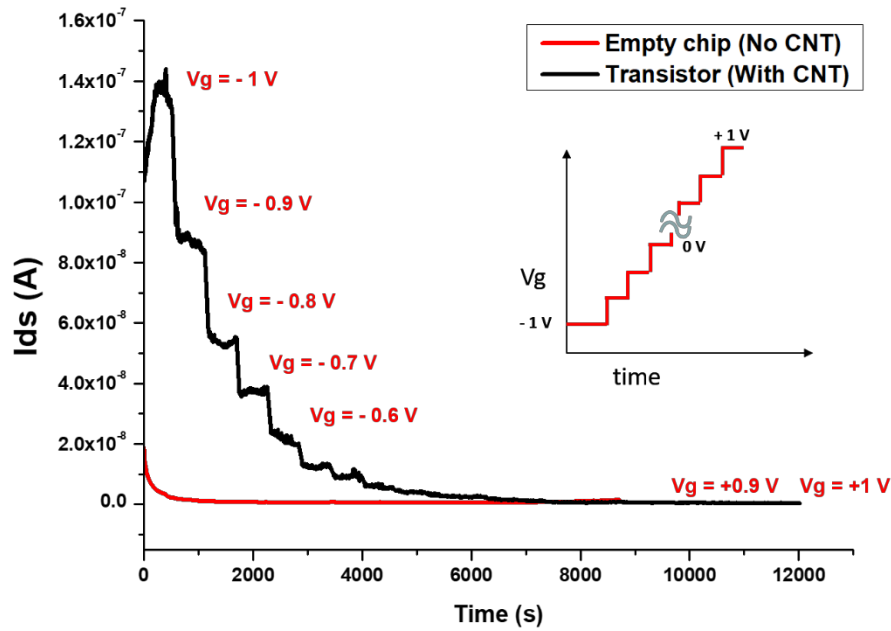

**Figure S6.** I-V transfer curves in water for p-CNTFET (Black solid line) and non-printed device (Red solid line) as reference.

Figure S7 shows the typical current response of a transistor over a pH step. To account for the stabilization time of the device after each chemical change, only the last 10% of the step is used to calculate the transistor response.

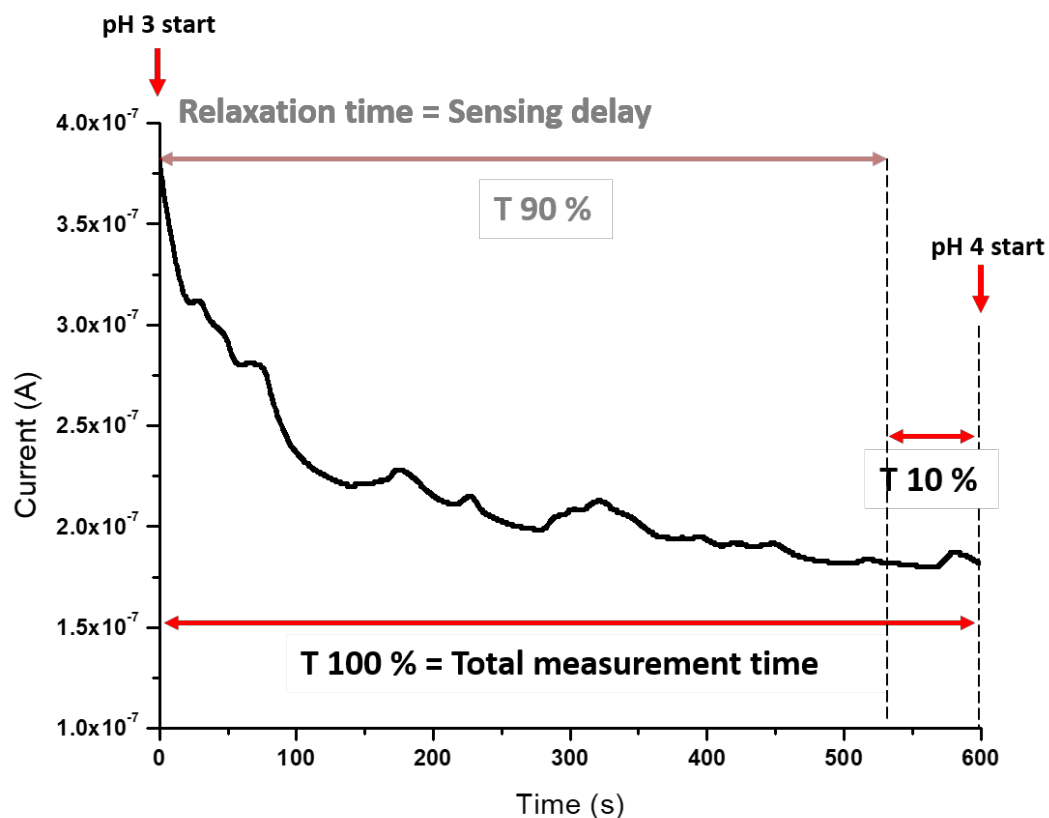

**Figure S7.** Data treatment process or real-time measured current values at a certain pH. The current response to a given pH step is calculated by averaging the last 10 percent of measured points for each pH step.

Figure S8 shows the I-V transfer curve of both types of CNTFETs in PBS at pH 7 in linear scale. The threshold voltage can be easily observed.

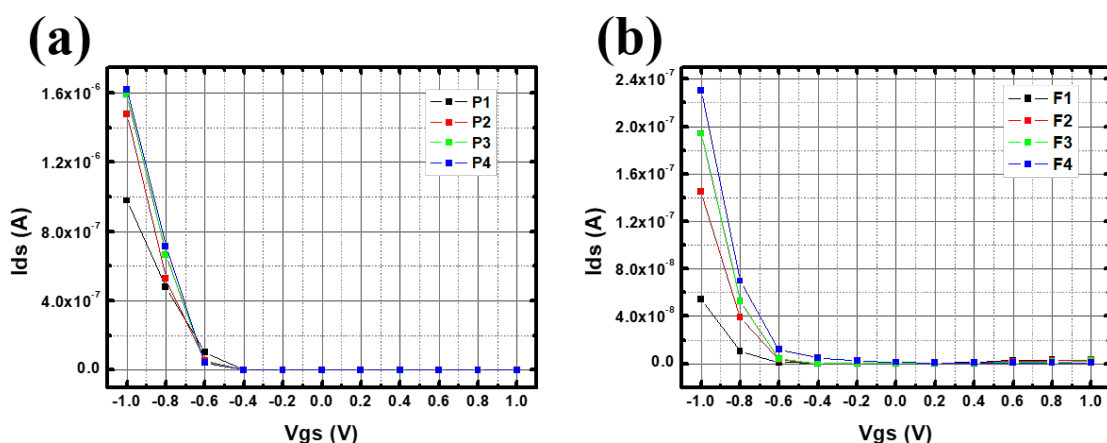

**Figure S8.** Linear I-V transfer curve of (a) p-CNTFETs and (b) f-CNTFETs in phosphate buffer solution (PBS) at pH 7. All transistors were 5  $\mu\text{m}$  channel devices.  $V_{\text{ds}}$  was set to +0.8 V and  $V_{\text{gs}}$  was swept from -1 V to +1 V.

## 5. I-V Transfer curves at different pH

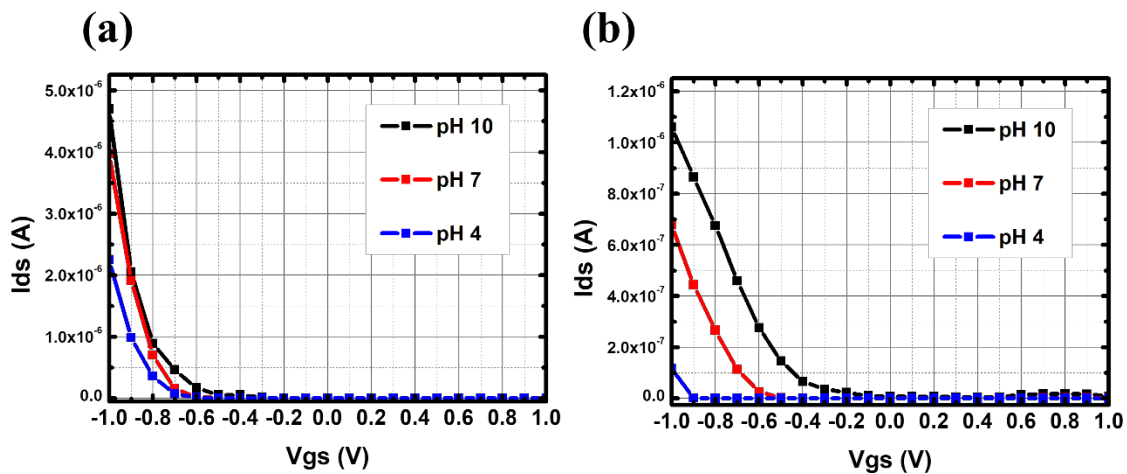

**Figure S9.** Linear I-V transfer curve of (a) p-CNTFETs and (b) f-CNTFETs in PBS with respect to different pH from pH 10 to pH 4.  $V_{ds}$  was fixed at +0.8 V.

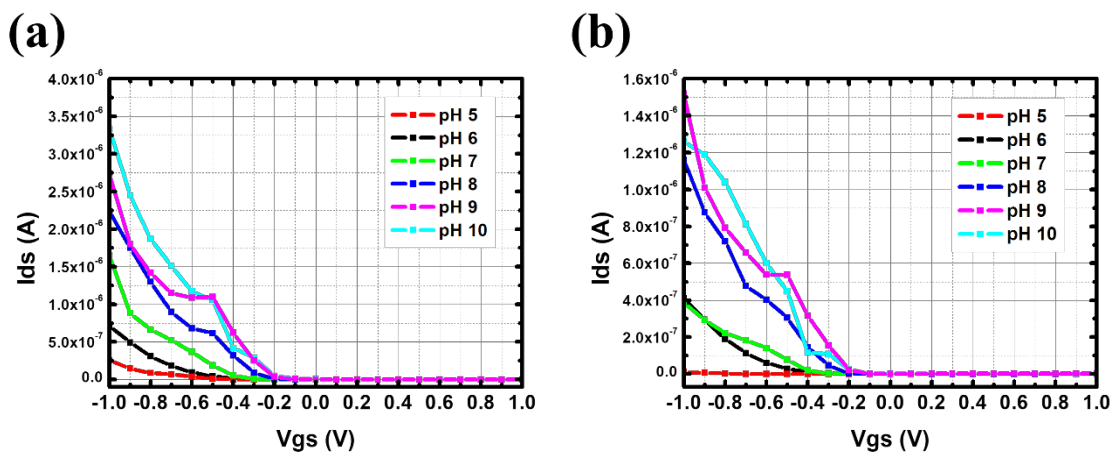

**Figure S10.** Linear I-V transfer curve of (a) p-CNTFETs and (b) f-CNTFETs in Borate buffer solution (BBS) with respect to different pH from pH 5 to pH 10.  $V_{ds}$  was fixed at +0.8 V.
